# Supplementary material for: Has COVID-19 changed how people think about the drivers of health? If so, does it matter?
Source: Frontiers journal article supplement (doi:10.3389/frhs.2022.987226), 2022-11-23
Supplement: Table_1.pdf [file Table_1.pdf]

## Appendix: Full Regression Output

Full results of logistic regression predicting receipt of COVID-19 vaccination

| Model covariates            | Coefficient (SE)    | Odds Ratio<br>(95% Confidence<br>Interval) |
|-----------------------------|---------------------|--------------------------------------------|
| <b>Health care they get</b> |                     |                                            |
| no effect                   | reference category  |                                            |
| some effect                 | 0.648*<br>(0.361)   | 1.912*<br>(0.943 - 3.880)                  |
| strong effect               | 1.516***<br>(0.356) | 4.552***<br>(2.266 - 9.145)                |
| <b>Place they live</b>      |                     |                                            |
| no effect                   | reference category  |                                            |
| some effect                 | 0.130<br>(0.261)    | 1.138<br>(0.682 - 1.900)                   |
| strong effect               | 0.708***<br>(0.266) | 2.029***<br>(1.206 - 3.415)                |
| <b>Choices they make</b>    |                     |                                            |
| no effect                   | reference category  |                                            |
| some effect                 | -0.0517<br>(0.435)  | 0.950<br>(0.405 - 2.226)                   |
| strong effect               | -0.718*<br>(0.408)  | 0.488*<br>(0.219 - 1.084)                  |
| <b>How they were born</b>   |                     |                                            |
| no effect                   | reference category  |                                            |
| some effect                 | -0.447*<br>(0.229)  | 0.639*<br>(0.408 - 1.001)                  |
| strong effect               | -0.296<br>(0.232)   | 0.743<br>(0.472 - 1.170)                   |
| <b>Race/Ethnicity</b>       |                     |                                            |
| white                       | reference category  |                                            |
| Black (non-Hispanic)        | 0.148<br>(0.279)    | 1.159<br>(0.670 - 2.005)                   |
| Hispanic                    | 0.0605<br>(0.218)   | 1.062<br>(0.693 - 1.628)                   |
| Asian/PI (non-Hispanic)     | 0.741<br>(0.647)    | 2.099<br>(0.590 - 7.464)                   |
| Other (non-Hispanic)        | -0.354<br>(0.355)   | 0.702<br>(0.350 - 1.408)                   |

| Family income level            |                      |                             |
|--------------------------------|----------------------|-----------------------------|
| <\$10,000                      | reference category   |                             |
| \$10k-24,999                   | 0.176<br>(0.375)     | 1.192<br>(0.572 - 2.486)    |
| \$25k-49,999                   | -0.00551<br>(0.347)  | 0.995<br>(0.504 - 1.961)    |
| \$50k-74,999                   | 0.242<br>(0.357)     | 1.274<br>(0.632 - 2.567)    |
| \$75k-99,999                   | 0.285<br>(0.391)     | 1.330<br>(0.618 - 2.862)    |
| \$100k+                        | 0.901**<br>(0.374)   | 2.462**<br>(1.182 - 5.128)  |
| Age                            |                      |                             |
| <45                            | reference category   |                             |
| 45-64                          | 0.364*<br>(0.207)    | 1.439*<br>(0.959 - 2.159)   |
| 65+                            | 1.010***<br>(0.223)  | 2.745***<br>(1.772 - 4.254) |
| Sex                            |                      |                             |
| male                           | reference category   |                             |
| female                         | -0.0549<br>(0.152)   | 0.947<br>(0.703 - 1.275)    |
| Highest level of education     |                      |                             |
| <HS                            | reference category   |                             |
| HS degree                      | 0.321<br>(0.416)     | 1.378<br>(0.610 - 3.112)    |
| some college                   | 0.478<br>(0.399)     | 1.612<br>(0.738 - 3.521)    |
| college degree                 | 1.070***<br>(0.412)  | 2.915***<br>(1.299 - 6.539) |
| Urbanicity                     |                      |                             |
| urban                          | reference category   |                             |
| rural                          | -0.510***<br>(0.166) | 0.601***<br>(0.433 - 0.832) |
| Constant                       | -0.623<br>(0.588)    | 0.537<br>(0.170 - 1.698)    |
| Observations                   | 1,623                |                             |
| Standard errors in parentheses |                      |                             |
| *** p<0.01, ** p<0.05, * p<0.1 |                      |                             |

Full results of logistic regression predicting the belief that the economy should have been kept open during the COVID-19 pandemic

| Model covariates            | Coefficient (SE)     | Odds Ratio<br>(95% Confidence Interval) |
|-----------------------------|----------------------|-----------------------------------------|
| <b>Health care they get</b> |                      |                                         |
| no effect                   | reference category   |                                         |
| some effect                 | 0.672**<br>(0.342)   | 1.958**<br>(1.002 - 3.824)              |
| strong effect               | -0.245<br>(0.330)    | 0.783<br>(0.410 - 1.494)                |
| <b>Place they live</b>      |                      |                                         |
| no effect                   | reference category   |                                         |
| some effect                 | -0.914***<br>(0.230) | 0.401***<br>(0.255 - 0.630)             |
| strong effect               | -1.248***<br>(0.226) | 0.287***<br>(0.184 - 0.447)             |
| <b>Choices they make</b>    |                      |                                         |
| no effect                   | reference category   |                                         |
| some effect                 | 0.0540<br>(0.379)    | 1.056<br>(0.503 - 2.217)                |
| strong effect               | 0.497<br>(0.359)     | 1.643<br>(0.814 - 3.318)                |
| <b>How they were born</b>   |                      |                                         |
| no effect                   | reference category   |                                         |
| some effect                 | 0.0564<br>(0.170)    | 1.058<br>(0.758 - 1.477)                |
| strong effect               | -0.0886<br>(0.169)   | 0.915<br>(0.657 - 1.276)                |
| <b>Race/Ethnicity</b>       |                      |                                         |
| white                       | reference category   |                                         |
| Black (non-Hispanic)        | -1.118***<br>(0.248) | 0.327***<br>(0.201 - 0.531)             |
| Hispanic                    | -0.746***<br>(0.187) | 0.474***<br>(0.329 - 0.684)             |
| Asian/PI (non-Hispanic)     | -0.376<br>(0.362)    | 0.686<br>(0.337 - 1.396)                |
| Other (non-Hispanic)        | -0.427               | 0.653                                   |

|                                   |                      |                             |
|-----------------------------------|----------------------|-----------------------------|
|                                   | (0.316)              | (0.351 - 1.213)             |
| <b>Family income level</b>        |                      |                             |
| <\$10,000                         | reference category   |                             |
| \$10k-24,999                      | 0.414<br>(0.377)     | 1.512<br>(0.722 - 3.168)    |
| \$25k-49,999                      | 0.925***<br>(0.352)  | 2.521***<br>(1.264 - 5.028) |
| \$50k-74,999                      | 1.079***<br>(0.356)  | 2.943***<br>(1.464 - 5.917) |
| \$75k-99,999                      | 1.039***<br>(0.372)  | 2.827***<br>(1.364 - 5.858) |
| \$100k+                           | 0.921***<br>(0.357)  | 2.513***<br>(1.248 - 5.058) |
| <b>Age</b>                        |                      |                             |
| <45                               | reference category   |                             |
| 45-64                             | 0.259<br>(0.178)     | 1.295<br>(0.913 - 1.837)    |
| 65+                               | -0.105<br>(0.183)    | 0.901<br>(0.629 - 1.289)    |
| <b>Sex</b>                        |                      |                             |
| male                              | reference category   |                             |
| female                            | -0.353***<br>(0.112) | 0.703***<br>(0.565 - 0.875) |
| <b>Highest level of education</b> |                      |                             |
| <HS                               | reference category   |                             |
| HS degree                         | -0.551<br>(0.410)    | 0.577<br>(0.258 - 1.288)    |
| some college                      | -0.332<br>(0.390)    | 0.718<br>(0.334 - 1.542)    |
| college degree                    | -0.798**<br>(0.396)  | 0.450**<br>(0.207 - 0.978)  |
| <b>Urbanicity</b>                 |                      |                             |
| urban                             | reference category   |                             |
| rural                             | 0.382***<br>(0.130)  | 1.465***<br>(1.135 - 1.891) |
| Constant                          | -0.0456<br>(0.566)   | 0.955<br>(0.315 - 2.895)    |

|              |       |
|--------------|-------|
| Observations | 1,632 |
|--------------|-------|

---

Standard errors in parentheses

\*\*\* p<0.01, \*\* p<0.05, \* p<0.1

Full results of logistic regression predicting the belief that local government went too far in restricting freedoms during COVID-19 pandemic

| Model covariates            | Coefficient (SE)     | Odds Ratio<br>(95% Confidence Interval) |
|-----------------------------|----------------------|-----------------------------------------|
| <b>Health care they get</b> |                      |                                         |
| no effect                   | reference category   |                                         |
| some effect                 | 0.205<br>(0.334)     | 1.227<br>(0.637 - 2.362)                |
| strong effect               | -0.578*<br>(0.328)   | 0.561*<br>(0.295 - 1.067)               |
| <b>Place they live</b>      |                      |                                         |
| no effect                   | reference category   |                                         |
| some effect                 | -0.394*<br>(0.222)   | 0.674*<br>(0.436 - 1.042)               |
| strong effect               | -0.990***<br>(0.222) | 0.372***<br>(0.241 - 0.574)             |
| <b>Choices they make</b>    |                      |                                         |
| no effect                   | reference category   |                                         |
| some effect                 | -0.0728<br>(0.380)   | 0.930<br>(0.441 - 1.960)                |
| strong effect               | 0.304<br>(0.358)     | 1.355<br>(0.672 - 2.731)                |
| <b>How they were born</b>   |                      |                                         |
| no effect                   | reference category   |                                         |
| some effect                 | 0.248<br>(0.186)     | 1.281<br>(0.891 - 1.843)                |
| strong effect               | 0.0439<br>(0.188)    | 1.045<br>(0.723 - 1.509)                |
| <b>Race/Ethnicity</b>       |                      |                                         |
| white                       | reference category   |                                         |
| Black (non-Hispanic)        | -0.336<br>(0.251)    | 0.715<br>(0.437 - 1.168)                |
| Hispanic                    | -0.318<br>(0.201)    | 0.727<br>(0.491 - 1.078)                |
| Asian/PI (non-Hispanic)     | 0.163<br>(0.379)     | 1.177<br>(0.560 - 2.475)                |
| Other (non-Hispanic)        | -0.179<br>(0.340)    | 0.836<br>(0.429 - 1.630)                |
| <b>Family income level</b>  |                      |                                         |

|                                   |                     |                            |
|-----------------------------------|---------------------|----------------------------|
| <\$10,000                         | reference category  |                            |
| \$10k-24,999                      | 0.453<br>(0.397)    | 1.572<br>(0.722 - 3.426)   |
| \$25k-49,999                      | 0.740**<br>(0.373)  | 2.095**<br>(1.008 - 4.353) |
| \$50k-74,999                      | 0.620<br>(0.379)    | 1.859<br>(0.884 - 3.911)   |
| \$75k-99,999                      | 0.773*<br>(0.398)   | 2.165*<br>(0.993 - 4.721)  |
| \$100k+                           | 0.597<br>(0.380)    | 1.817<br>(0.863 - 3.826)   |
| <b>Age</b>                        |                     |                            |
| <45                               | reference category  |                            |
| 45-64                             | 0.227<br>(0.193)    | 1.255<br>(0.860 - 1.831)   |
| 65+                               | -0.257<br>(0.202)   | 0.773<br>(0.520 - 1.149)   |
| <b>Sex</b>                        |                     |                            |
| male                              | reference category  |                            |
| female                            | -0.275**<br>(0.125) | 0.760**<br>(0.595 - 0.971) |
| <b>Highest level of education</b> |                     |                            |
| <HS                               | reference category  |                            |
| HS degree                         | -0.642<br>(0.411)   | 0.526<br>(0.235 - 1.177)   |
| some college                      | -0.609<br>(0.391)   | 0.544<br>(0.253 - 1.170)   |
| college degree                    | -0.889**<br>(0.398) | 0.411**<br>(0.189 - 0.897) |
| <b>Urbanicity</b>                 |                     |                            |
| urban                             | reference category  |                            |
| rural                             | 0.210<br>(0.145)    | 1.233<br>(0.929 - 1.638)   |
| Constant                          | -0.275<br>(0.567)   | 0.759<br>(0.250 - 2.309)   |
| Observations                      | 1,631               |                            |
| Standard errors in parentheses    |                     |                            |
| *** p<0.01, ** p<0.05, * p<0.1    |                     |                            |
